# INFOGRAPHICS IN ANESTHESIOLOGY

Complex Information for Anesthesiologists Presented Quickly and Clearly

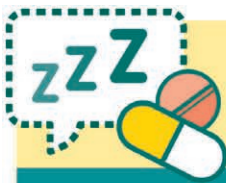

## Obstructive Sleep Apnea and Opioid-induced Respiratory Depression:

## What do we know?

### Prior Work<sup>1</sup>

**19** asleep OSA patients  
*randomized to*

 remifentanyl  
0.075 mg/kg-IBW per hour

 **vs.**  
saline infusion  
20 ml per hour

**while observing**

Obstructive apnea  
Sleep variables  SpO<sub>2</sub>  
Central apnea

Patients receiving remifentanyl  
were observed to have:

 • REM sleep  
• Sleep efficiency  
• Obstructive apnea  
• SpO<sub>2</sub>  Central apnea events increased markedly

**Moderate OSA and opioid administration primarily increases risk of central apnea.**

### In this Issue<sup>2</sup>

**30** awake OSA patients  
**vs.**

**20** awake control  
*received*

 **10'** remifentanyl  
0.2 mcg/kg-IBW per min

**while observing**

V<sub>t</sub>  EtCO<sub>2</sub>  
RR MV

Using predicted remifentanyl  
effect site concentrations to  
measure OSA impact, none  
was seen.

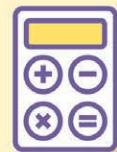

 **OSA does not affect the relationship between opioid dose and any ventilation parameters during a brief infusion.**

**More research is needed to understand how we can best care for patients with OSA.**

EtCO<sub>2</sub>, end-tidal carbon dioxide; IBW, ideal body weight; MV, minute ventilation; OSA, obstructive sleep apnea; REM, rapid eye movement; RR, respiratory rate; SpO<sub>2</sub>, oxygen saturation measured by pulse oximetry; V<sub>t</sub>, tidal volume.

Infographic created by Jonathan P. Wanderer, Vanderbilt University Medical Center, and James P. Rathmell, Brigham and Women's Health Care/Harvard Medical School. Illustration by Annemarie Johnson, Vivo Visuals. Address correspondence to Dr. Wanderer: jonathan.p.wanderer@vanderbilt.edu.

1. Bernards CM, Knowlton SL, Schmidt DF, DePaso WJ, Lee MK, McDonald SB, Bains OS: Respiratory and sleep effects of remifentanyl in volunteers with moderate obstructive sleep apnea. *ANESTHESIOLOGY* 2009; 110:41–9
2. Doufas AG, Shafer SL, Rashid NHA, Kushida CA, Capasso R: Non-steady state modeling of the ventilatory depressant effect of remifentanyl in awake patients experiencing moderate-to-severe obstructive sleep apnea. *ANESTHESIOLOGY* 2019; 130:213–26
